# Supplementary material for: Measurements of hybrid fertility and a test of mate preference for two house mouse races with massive chromosomal divergence
Source: BMC Evol Biol. 2019 Jan 16;19:25. doi: 10.1186/s12862-018-1322-y (PMC6335807; doi:10.1186/s12862-018-1322-y)
Supplement: Supplementary file 5 — Data of litter sizes for all litters of hybrid and control females. (XLSX 14 kb) [file 12862_2018_1322_MOESM5_ESM.xlsx]

## Sheet: Sheet1
Data of litter sizes for all litters of hybrid and control females
Female ID	Female category	Female origin (parental breeding pair ID)	Number of offspring in litter	Order of litter
1	BC.24	B30/1	9	first
1	BC.24	B30/1	9	second
2	BC.23	mA31	3	first
2	BC.23	mA31	1	second
3	BC.23	B72/1	2	first
4	BC.24	mA183	8	first
5	BC.24	B27/2	7	first
5	BC.24	B27/2	7	second
6	BC.24	B3/1	7	first
6	BC.24	B3/1	7	second
6	BC.24	B3/1	6	third
7	BC.23	B62/1	1	first
8	BC.24	B21/1	6	first
8	BC.24	B21/1	7	second
9	BC.24	B25/1	6	first
9	BC.24	B25/1	7	second
10	BC.24	B27/3	8	first
10	BC.24	B27/3	8	second
11	BC.23	B33/1	1	first
12	BC.24	B33/1	7	first
12	BC.24	B33/1	5	second
13	F1	A14/1	1	first
14	F1	A2/1	1	first
15	F1	A3/1	1	first
16	F1	A4/4	1	first
16	F1	A4/4	1	second
16	F1	A4/4	1	third
17	F1	A6/4	1	first
18	F1	A5/1	1	first
18	F1	A5/1	1	second
19	F1	A5/1	1	first
20	F1	A5/1	1	first
21	F1	A7/1	1	first
22	F1	A9/1	1	first
23	F1	A9/1	1	first
24	F1	A10/1	1	first
25	F1	A11/1	1	first
26	F1	A12/1	1	first
27	F1	A12/1	2	first
28	F1	A8/1	1	first
29	F1	A14/1	1	first
30	F1	A14/1	1	second
30	F1	A14/1	1	third
31	CHBU	S3005	5	first
32	CHBU	Z45	7	first
33	CHBU	Z30	3	first
34	CHBU	S1003	6	first
35	CHBU	Z31	8	first
36	CHBU	Z31	7	first
37	CHBU	Z48	7	first
38	CHBU	Z48	8	first
39	CHBU	Z64	6	first
40	CHBU	Z36	5	first
41	CHBU	S1009	5	first
42	CHBU	S1009	6	first
43	CHHN	i1	6	first
44	CHHN	ZI230	2	first
45	CHHN	ZI233	8	first
46	CHHN	ZI249	6	first
47	CHHN	ZI238	7	first
48	CHHN	ZI247	7	first
49	CHHN	i7	7	first
50	CHHN	ZI246	7	first
51	CHHN	ZI251	6	first
52	CHHN	ZI259	7	first
53	CHHN	ZI245	7	first
54	CHHN	ZI243	5	first
